# Supplementary material for: Insight into Site Environment and Photoluminescence Properties of Cr3+-doped Gallogermanate Toward NIR pc-LEDs Applications
Source: Research Square preprint supplement (doi:10.21203/rs.3.rs-8234812/v1), 2025-12-02
Supplement: Supplementary file 1 [file 9e3e279e8e35f95cc32735fd.docx]

***Supplementary material***

**Insight into Site Environment and Photoluminescence Properties of Cr3+-doped Gallogermanate Toward NIR pc-LEDs Applications**

Wenjie Deng 1, Decai Huang 1, 2, 3, *, Wangzu Zou 1, Zhi Zhang 1, Shuping Huang 1, Haiping Luo 1, Jiaqing Peng 1, 2, 3, Weixiong You 1, 2, 3, Zhihua Xiong 3, 4, Jing Zhu 5 and Xinyu Ye 1, 2, 3, 4

*1 College of Rare Earths, Jiangxi University of Science and Technology, Ganzhou 341000, P.R. China*

*2 National Rare Earth Functional Materials Manufacturing Innovation Centre, Guorui Kechuang Rare Earth Functional Materials (Ganzhou) Co., Ltd, Ganzhou 341000, P. R. China*

*3 Key Laboratory of Testing and Tracing of Rare Earth Products for State Market Regulation, Jiangxi University of Science and Technology, Ganzhou 341000, P.R. China*

*4 Key Laboratory of Low Dimensional Quantum Materials and Sensor Devices of Jiangxi Education Institutes, Ganzhou 341000, China*

*5 Yunnan Key Laboratory of Electromagnetic Materials and Devices, School of Materials and Energy, Yunnan University, Kunming 650091, P. R. China*

* Corresponding author;

Email: hdecai@jxust.edu.cn


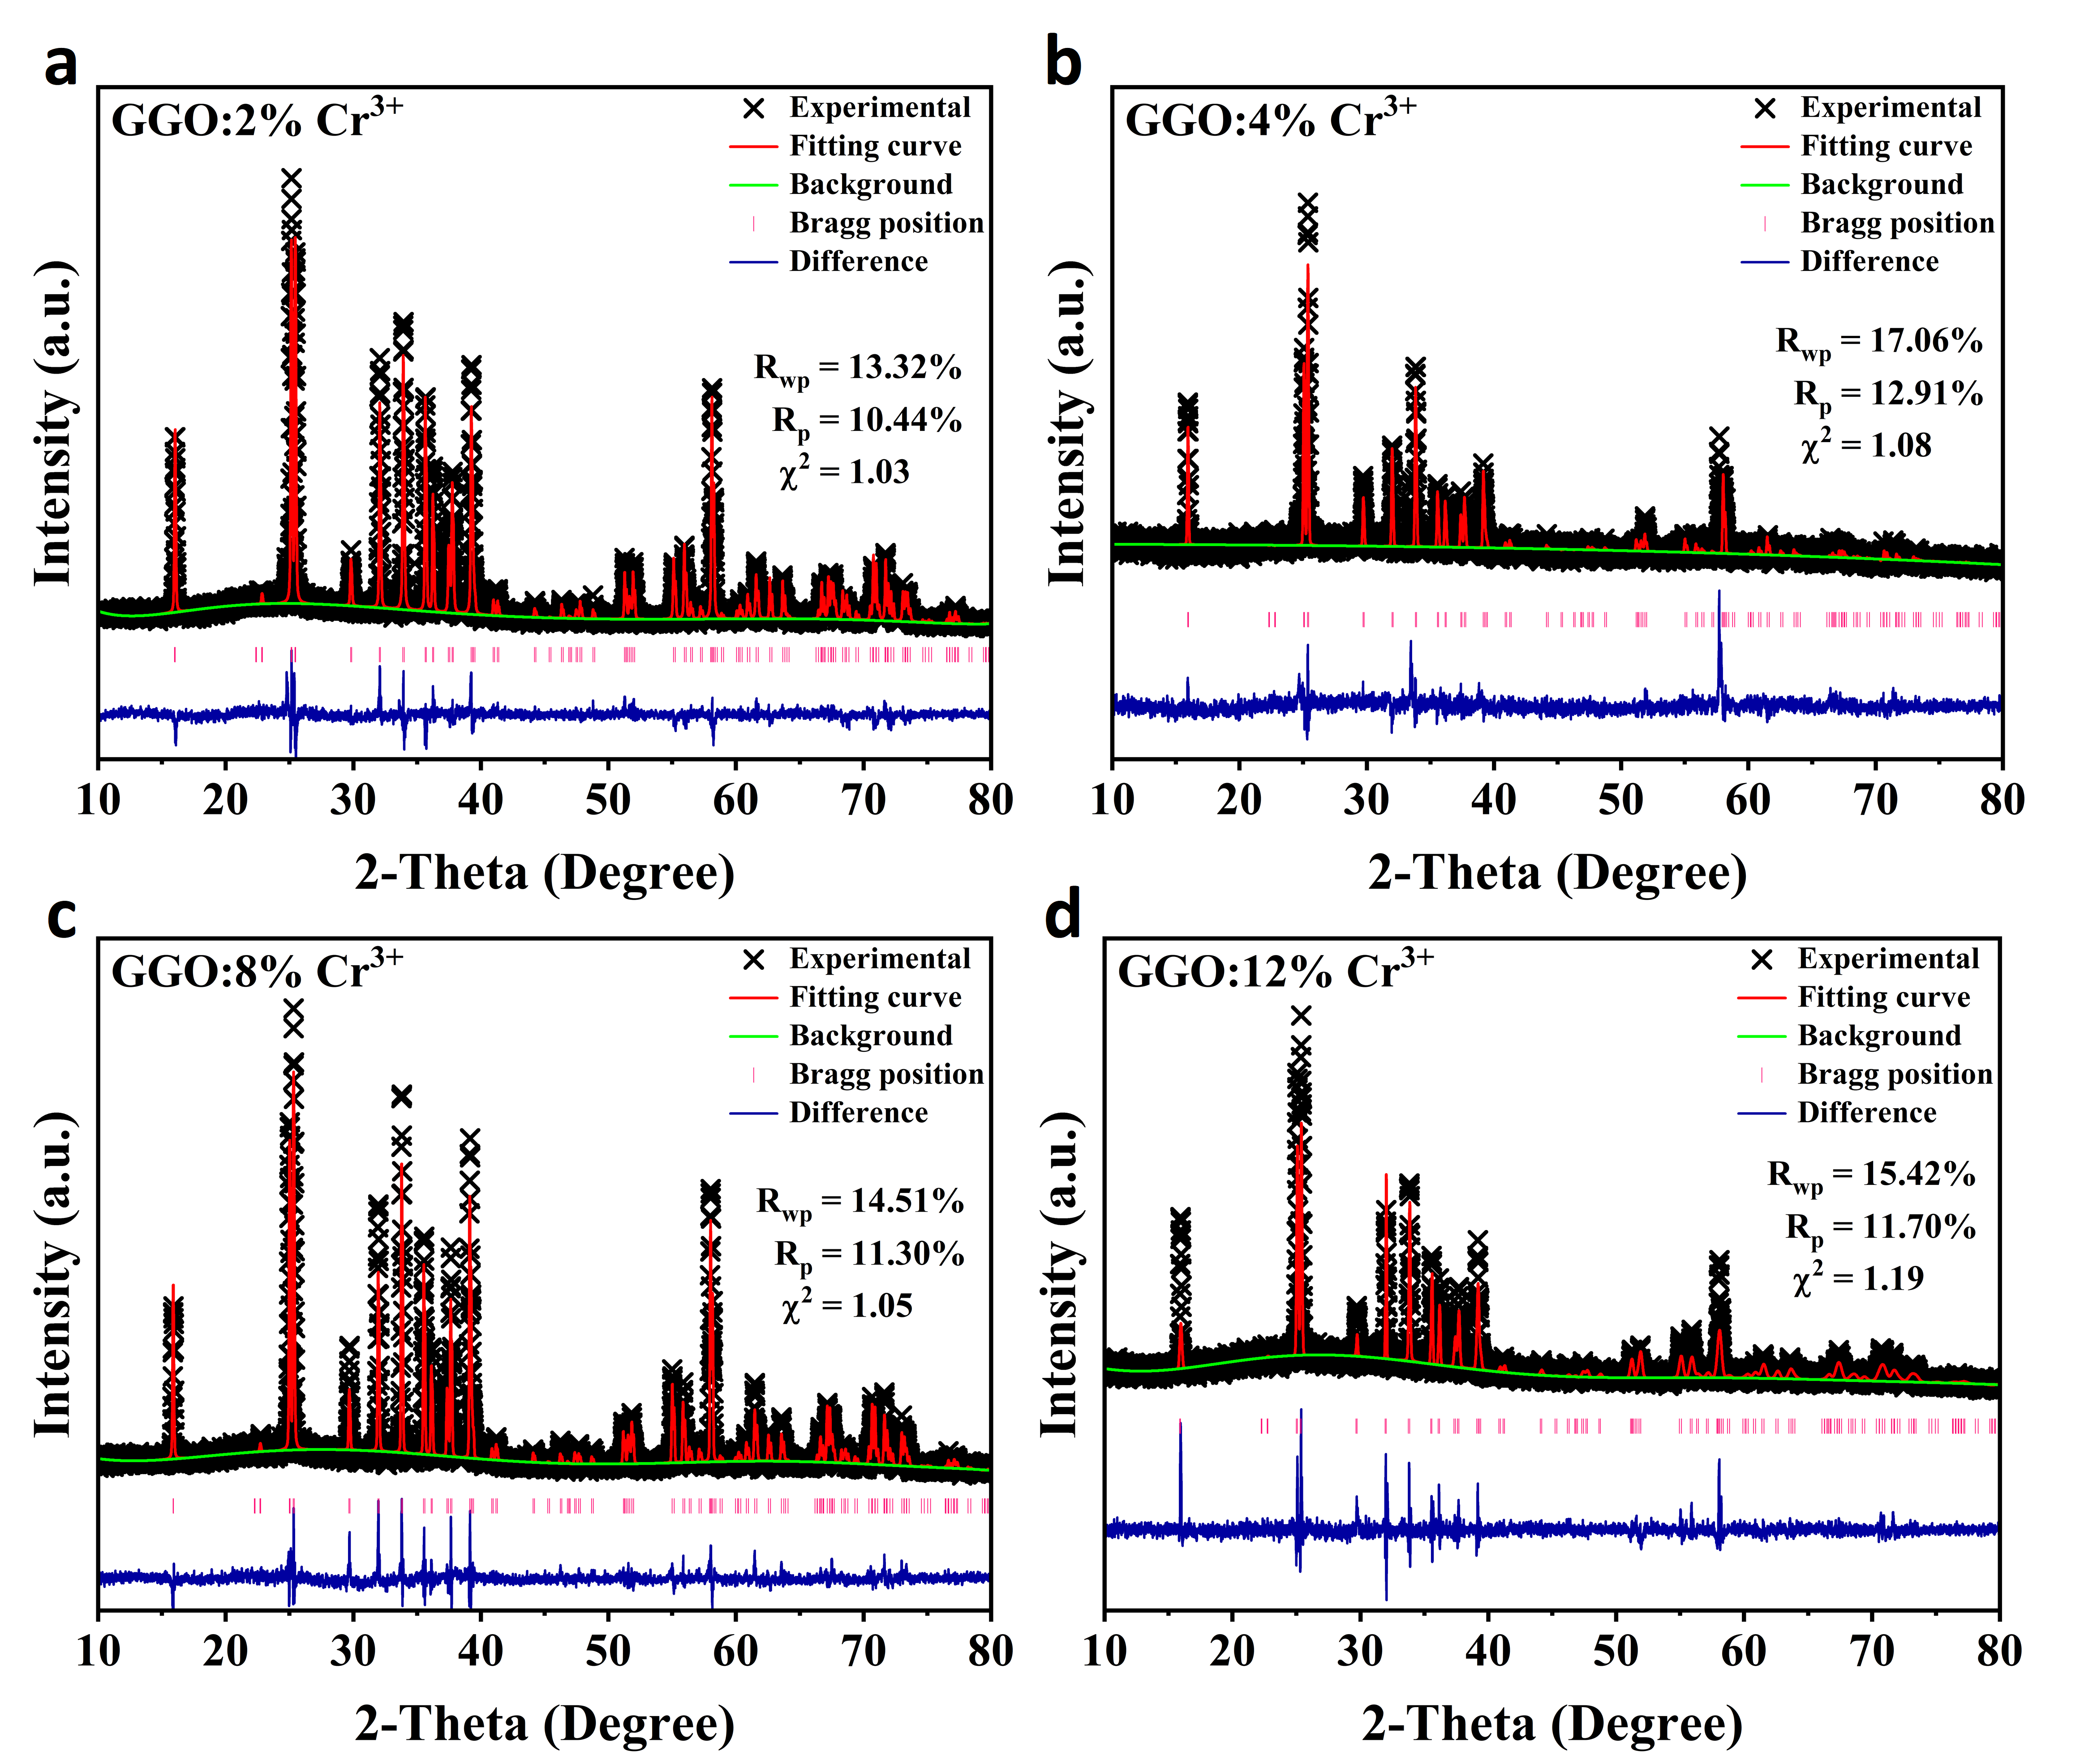


**Fig. S1** XRD Rietveld refinement of GGO: *y*Cr3+ (*y* = 2%, 4%, 8%, and 12%).

**Fig. S2** EDS spectrum of the GGO:6% Cr3+.


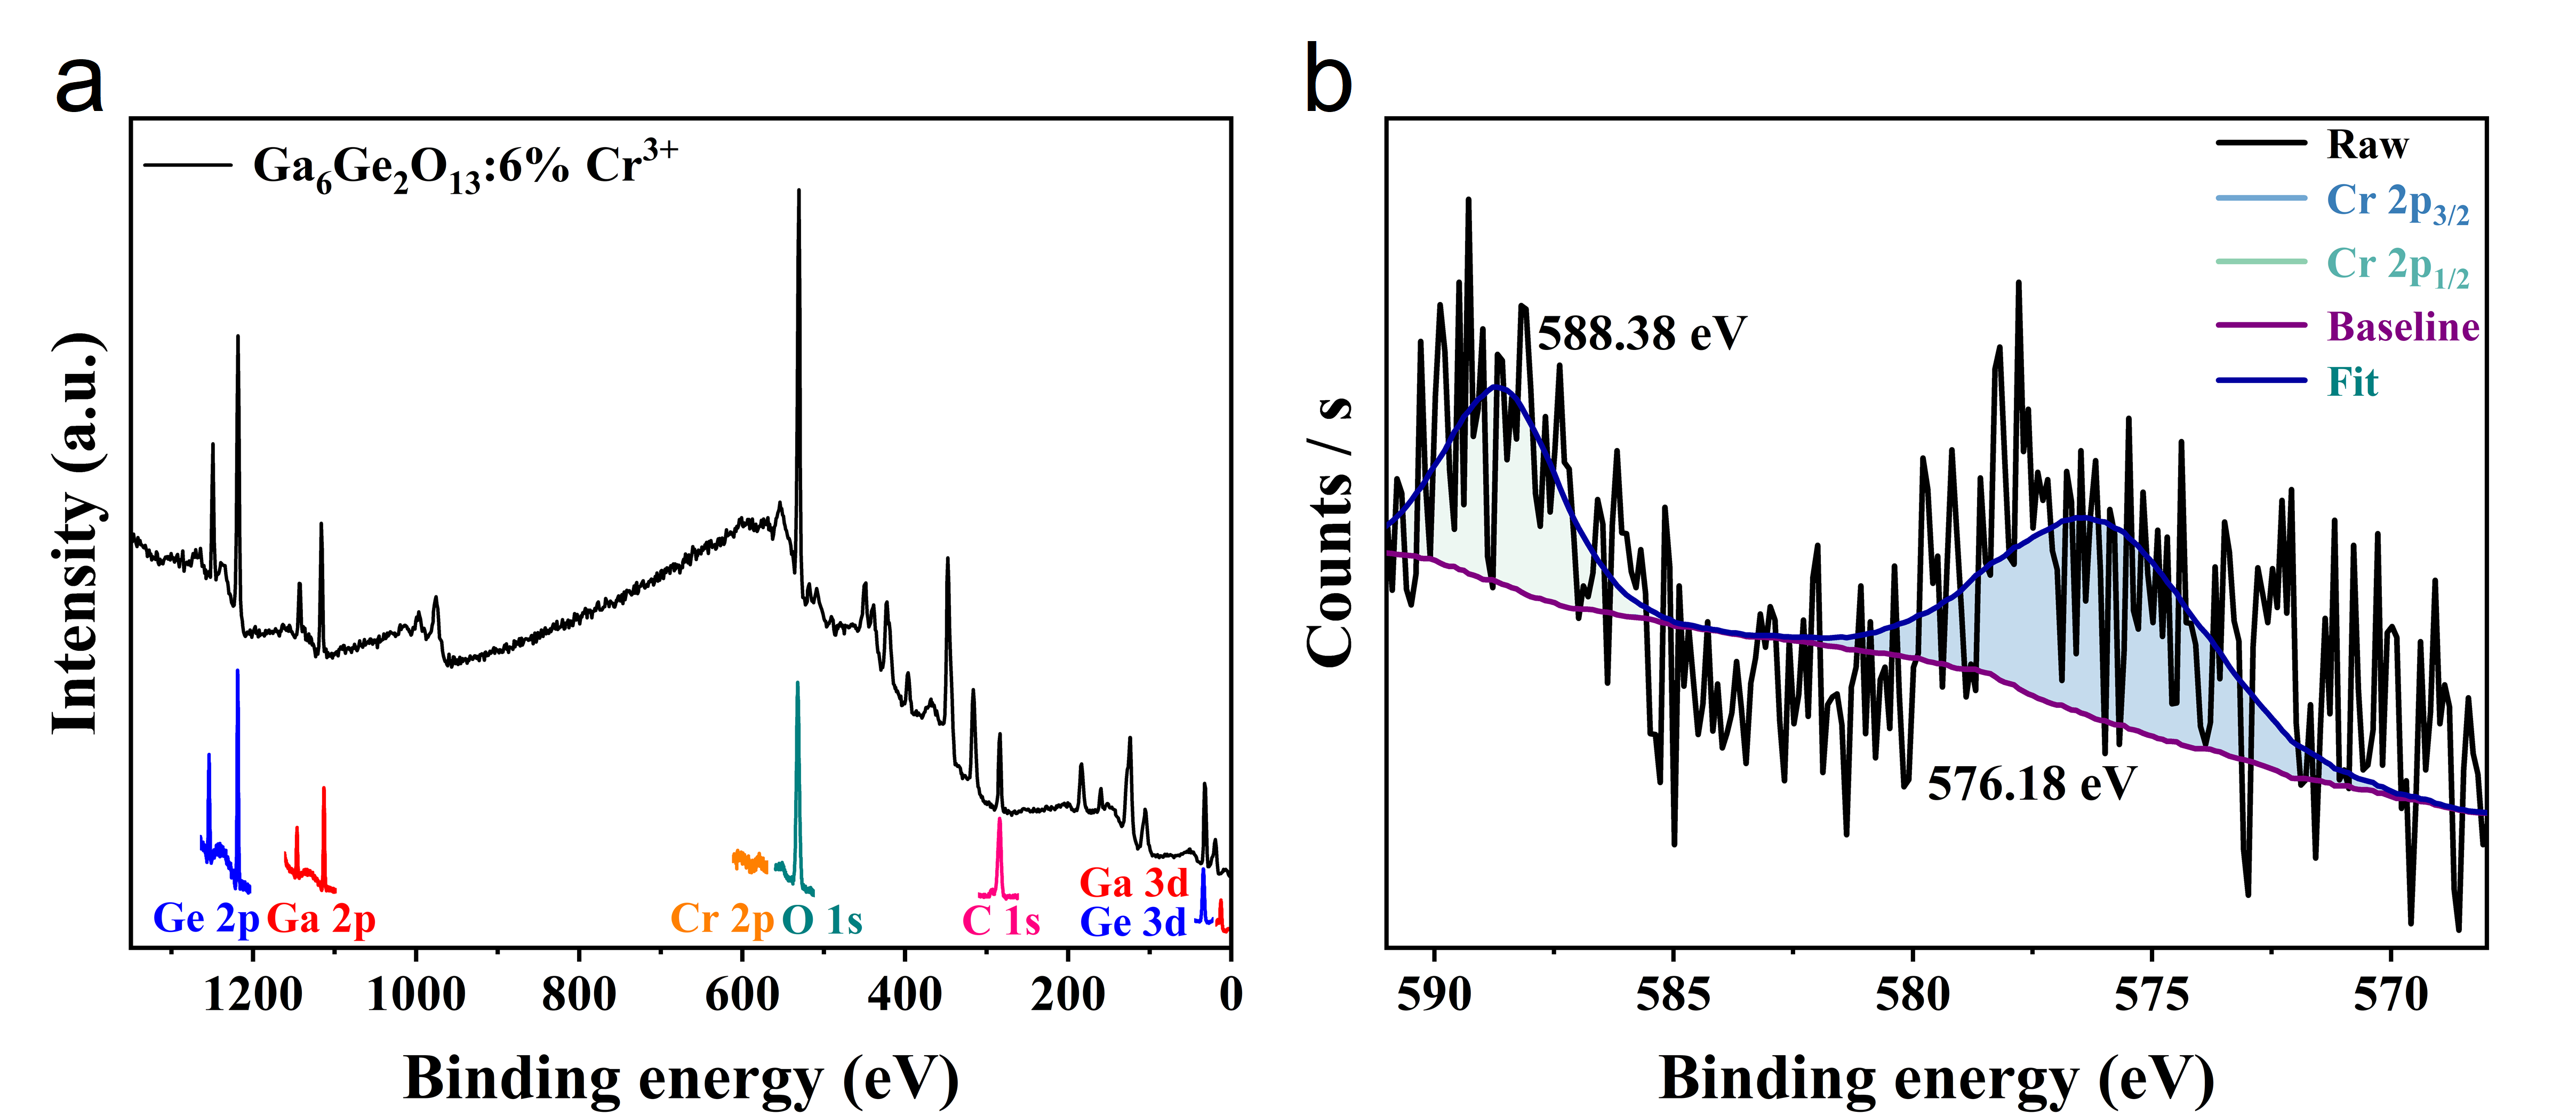


**Fig. S3** **a** XPS survey spectrum of the GGO:6% Cr3+. **b** The high-resolution Cr 2p spectrum.


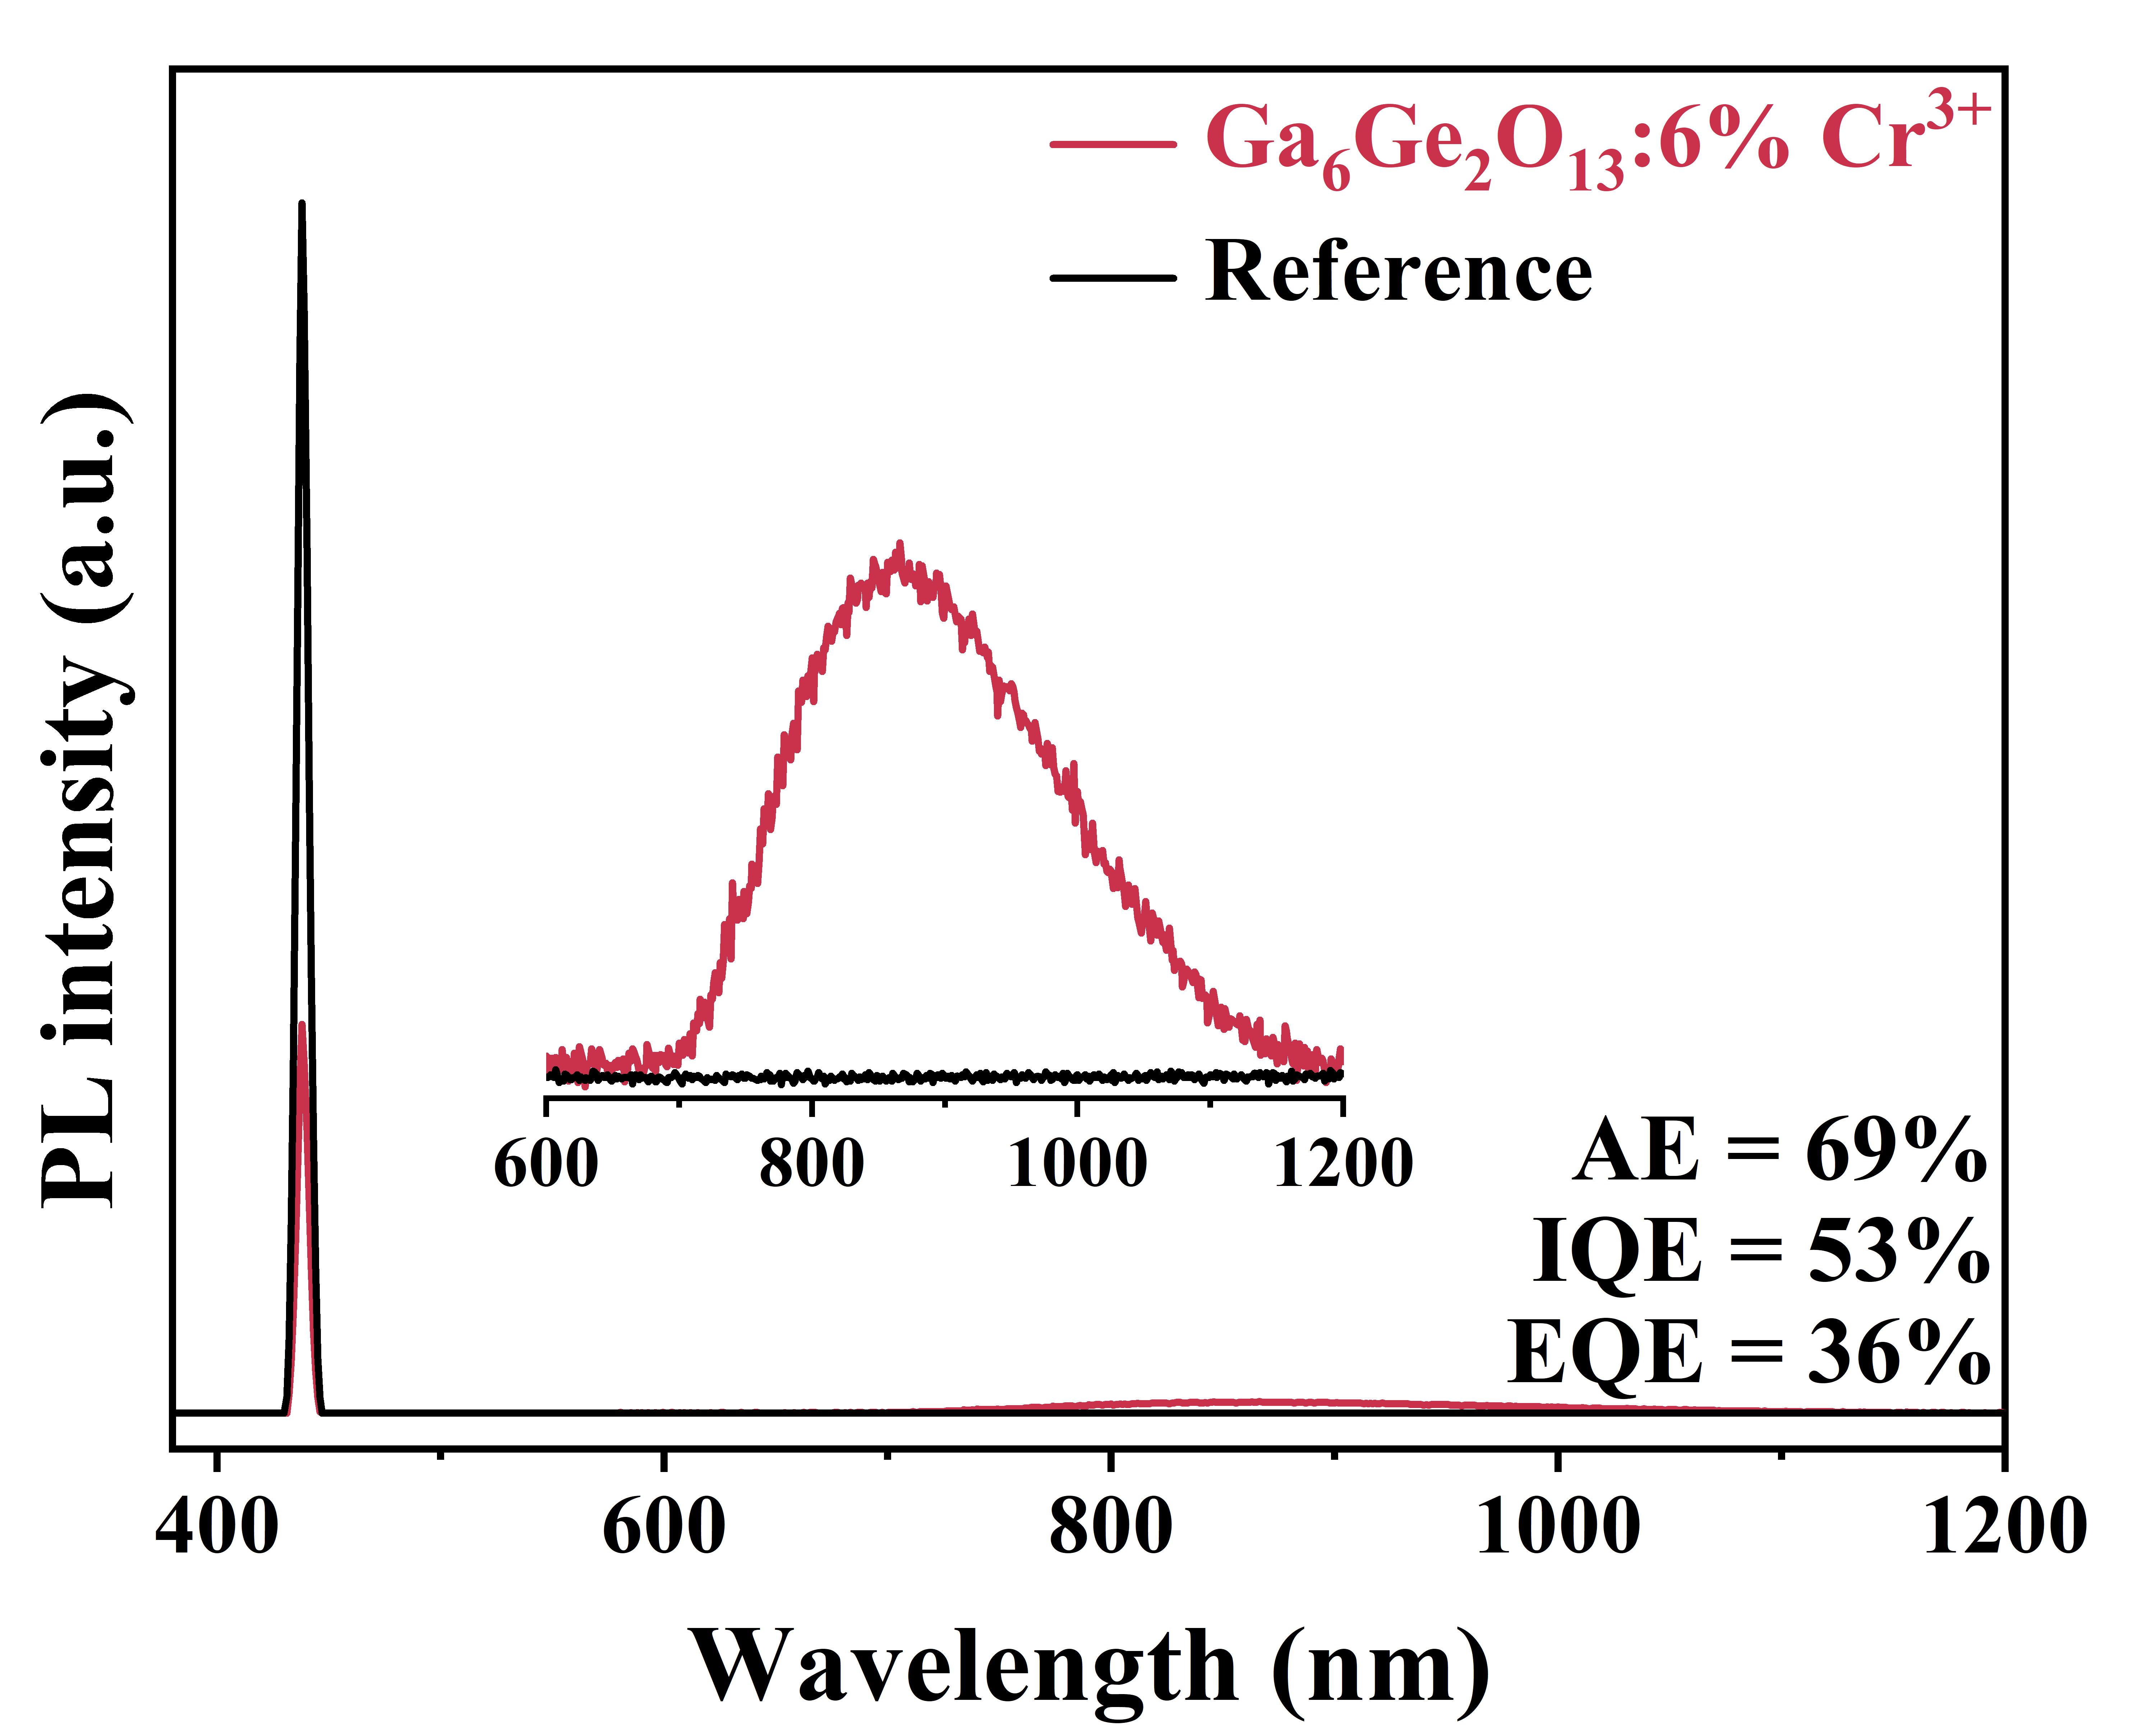


**Fig. S4** PL QY spectrum of GGO:6% Cr3+.


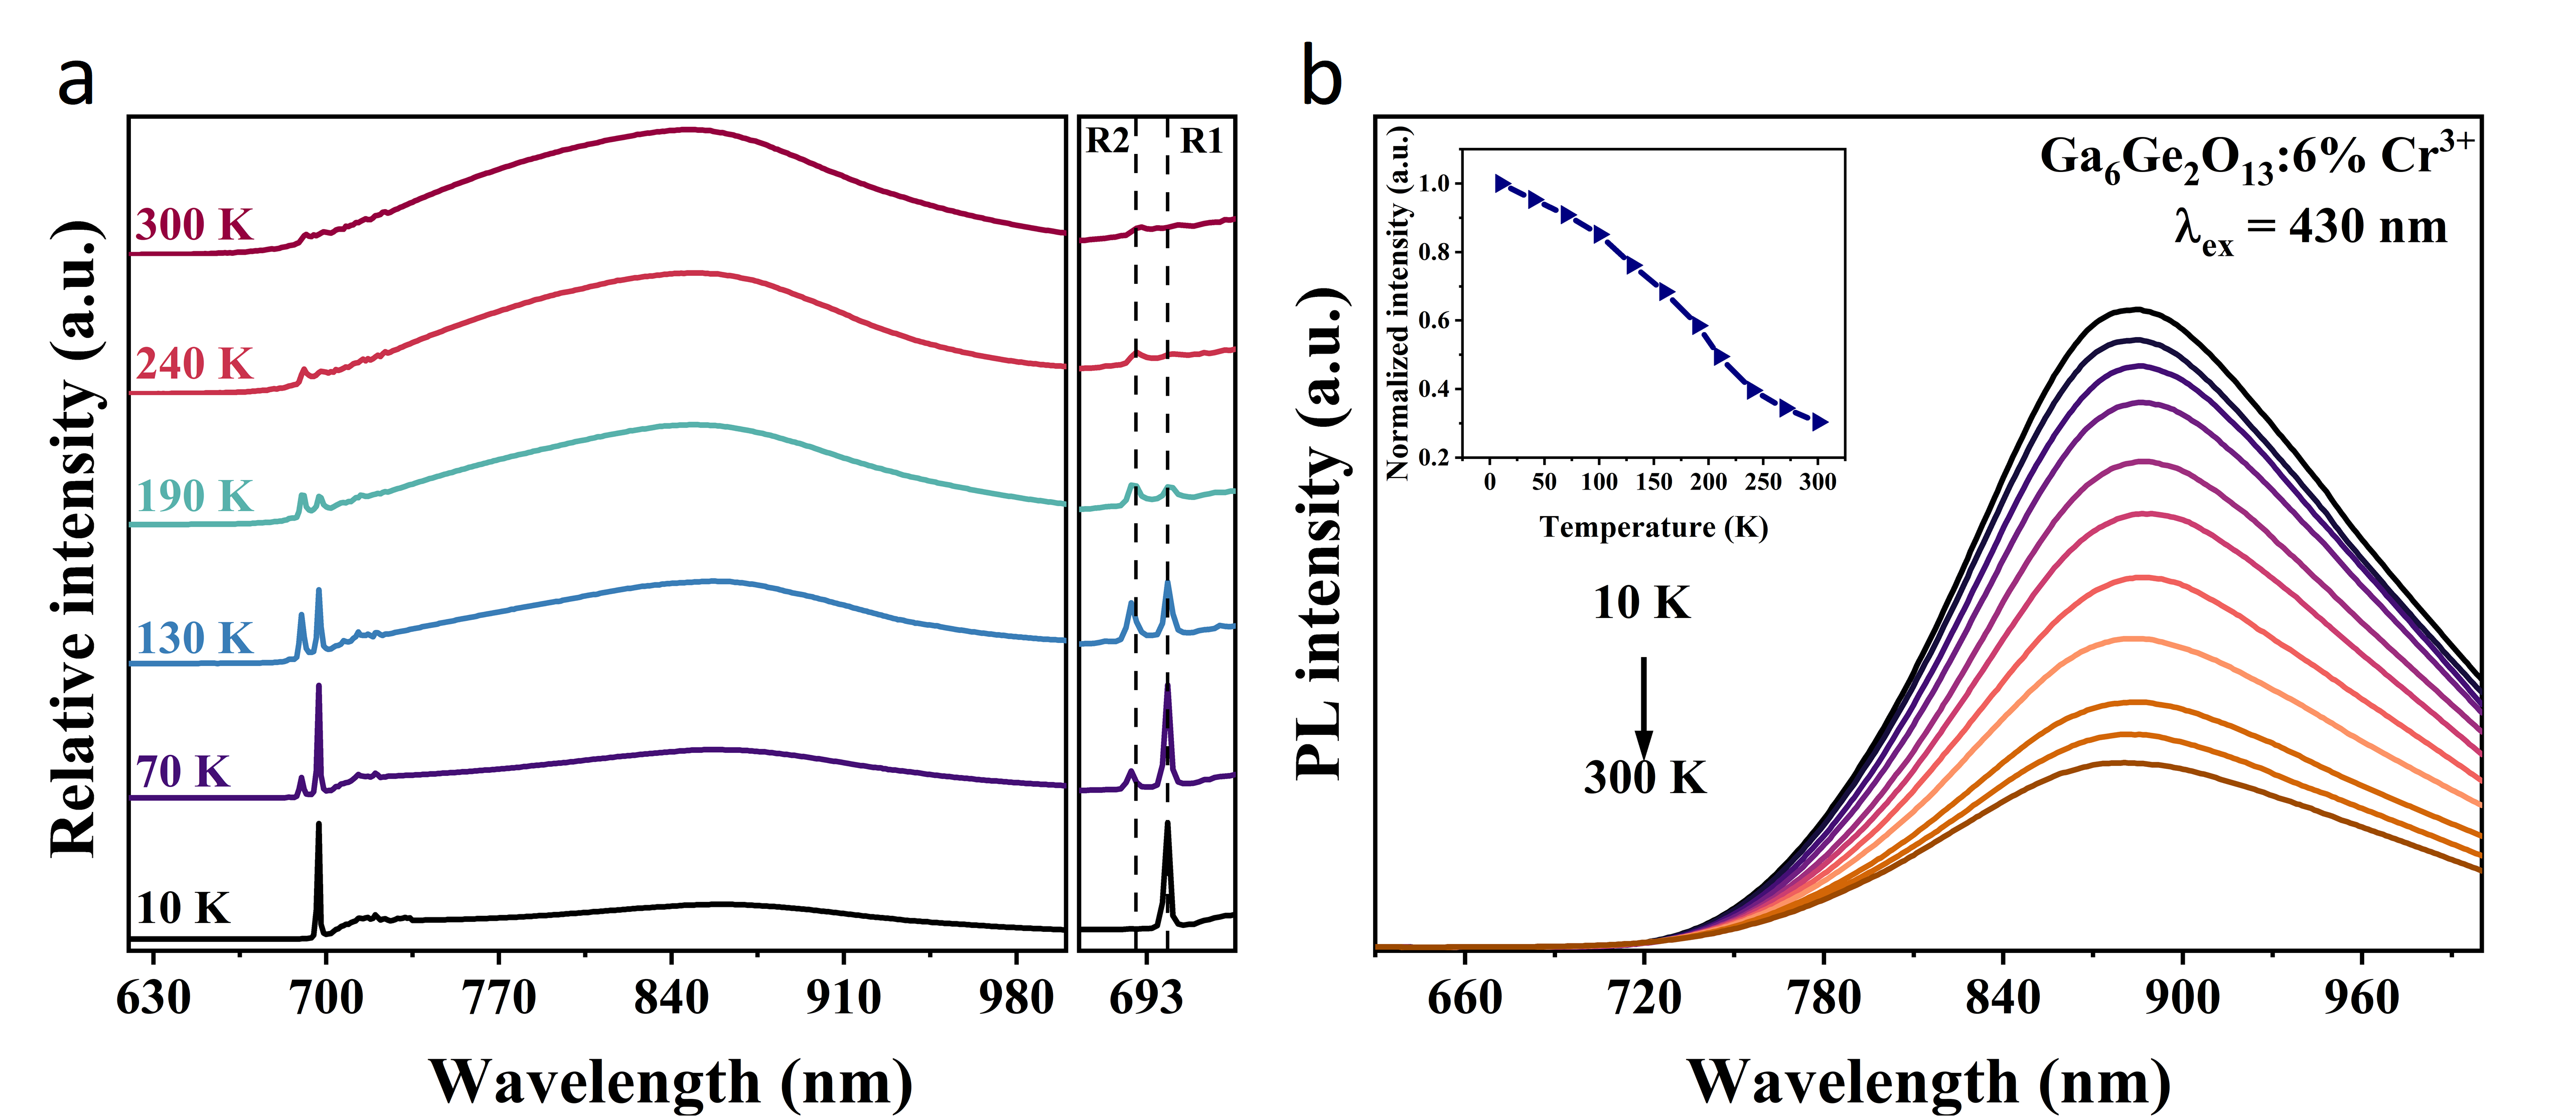


**Fig. S5** **a, b** Temperature-dependent PL spectra of GGO:0.1% Cr3+ and GGO:6% Cr3+ at 10 K – 300 K, respectively.


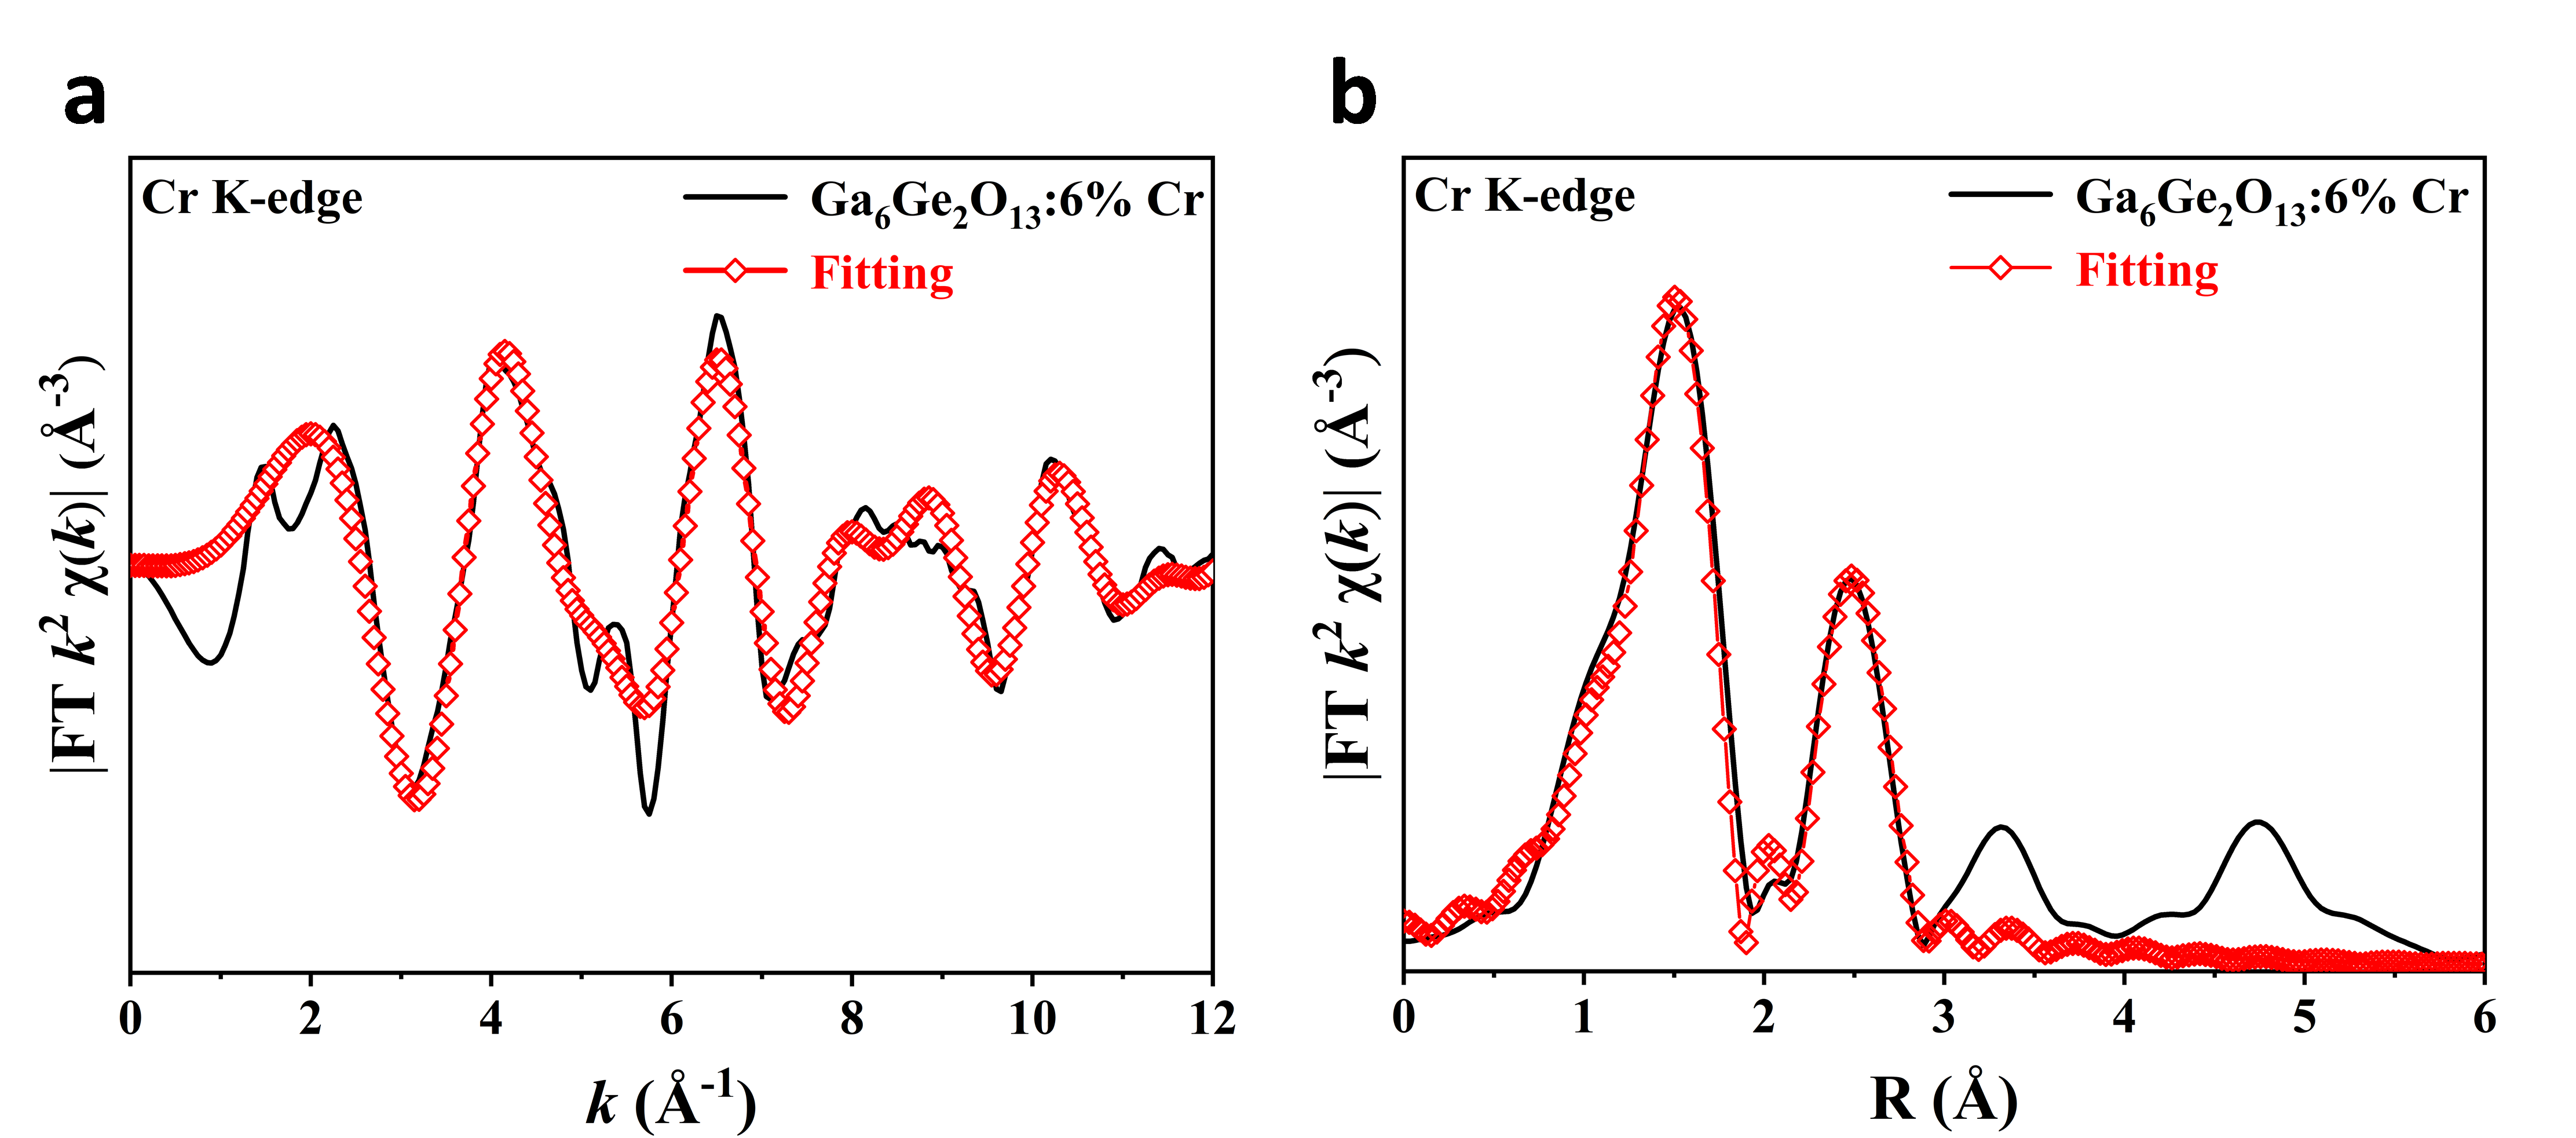


**Fig. S6** **a** FT-EXAFS fitting of Cr for the Ga6Ge2O13:6% Cr3+ at k space. **b** R-space EXAFS spectra at Cr K-edge of the Ga6Ge2O13:6% Cr3+.

The crystal field strength *Dq*/*B* of Cr3+ ions in octahedral coordination can be obtained by the following equation 1, 2:

Where *Dq* is the parameter describing the crystal field strength, *B* is the Racah parameter, and *E* represents the energy of the transition between the two energy levels, which can be obtained from the excitation spectrum data. According to the experimental data, the energies of 4T1 (433 nm, 23142 cm-1) and 4T2 (594 nm, 16836 cm-1) states of Cr3+ were determined. Substitution into the above expression yielded a *Dq*/*B* value of 2.74 for GGO:0.1%Cr3+ at 10 K, indicating a strong crystal field environment where the 4T2 and 2E energy levels lie close in energy. Therefore, the R-line emission and broadband emission can be observed simultaneously. The Tanabe-Sugano (TS) diagram of Cr3+ (3d3) ions in the octahedral crystal field is given in Fig. 5b.

For the tetrahedral coordination, the T-S diagram of the 3d3 system is equivalent to that of the 3d7 system in an octahedral field (Fig. 5c). The *Dq*/*B* value of Cr3+ ions in tetrahedral environment was evaluated using the following expressions (4) – (5) 3:

According to the experimental data of the excitation spectra of GGO:0.1% Cr3+ at 850 nm monitored at 10 K, the energies of 4T1 (P) (290 nm, 34441 cm-1), 4A2 (F) (540 nm, 18532 cm-1) and 4T2 (F) (658 nm, 15190 cm-1) levels were determined.

**Table S1.** Structure Refinement Parameters of Ga6Ge2O13 and Ga6Ge2O13:6% Cr3+.

| **Phase** |  | **Ga6Ge2O13**  **(Host)** | **Ga6Ge2O13:6% Cr3+** |
| --- | --- | --- | --- |
| **Space Group** | P b a m | | |
| **Cell parameters** | a(Å) | 7.878(72) | 7.870(63) |
| b(Å) | 8.037(46) | 8.029(46) |
| c(Å) | 3.024(65) | 3.020(36) |
| α(°) | 90 | 90 |
| β(°) | 90 | 90 |
| γ(°) | 90 | 90 |
| **Volume-Å3** | Unit | 191.536(11) | 190.877(90) |
| **R-factors** | Rwp | 7.82% | 8.55% |
| Rp | 5.73% | 6.39% |
| Gof | 1.81 | 1.99 |

**Table S2.** Refined atom positions and occupancies of Ga6Ge2O13 and Ga6Ge2O13:6% Cr3+.

| **Compounds** | **Atom** | **x** | **y** | **z** | **Fraction** | **Uiso (Å)** |
| --- | --- | --- | --- | --- | --- | --- |
| **Ga6Ge2O13 (host)** | Ga | 0.000(0) | 0.000(0) | 0.000(0) | 1.00000 | 0.01077 |
| GaT | 0.149(8) | 0.340(9) | 0.500(0) | 0.50000 | 0.01089 |
| Ge | 0.149(8) | 0.340(9) | 0.500(0) | 0.34500 | 0.01089 |
| GaT* | 0.267(6) | 0.212(3) | 0.500(0) | 0.15500 | 0.01520 |
| Od | 0.130(0) | 0.216(3) | 0.000(0) | 1.00000 | 0.01773 |
| Oab | 0.364(5) | 0.423(3) | 0.500(0) | 1.00000 | 0.01520 |
| Oc | 0.500(0) | 0.000(0) | 0.500(0) | 0.54000 | 0.03293 |
| Oc* | 0.441(0) | 0.049(0) | 0.500(0) | 0.15000 | 0.04179 |
| **Ga6Ge2O13:6% Cr3+** | Ga | 0.000(0) | 0.000(0) | 0.000(0) | 0.94000 | 0.01077 |
| Cr | 0.000(0) | 0.000(0) | 0.000(0) | 0.06000 | 0.02500 |
| GaT | 0.149(8) | 0.340(9) | 0.500(0) | 0.50000 | 0.01089 |
| Ge | 0.149(8) | 0.340(9) | 0.500(0) | 0.34500 | 0.01089 |
| GaT* | 0.267(6) | 0.212(3) | 0.500(0) | 0.15500 | 0.01520 |
| Od | 0.130(0) | 0.216(3) | 0.000(0) | 1.00000 | 0.01773 |
| Oab | 0.364(5) | 0.423(3) | 0.500(0) | 1.00000 | 0.01520 |
| Oc | 0.500(0) | 0.000(0) | 0.500(0) | 0.54000 | 0.03293 |
| Oc* | 0.441(0) | 0.049(0) | 0.500(0) | 0.15000 | 0.04179 |

**Table S3.** Luminescence parameters of several typical Cr3+-activated long-wave broadband NIR phosphors.

| **Phosphors** | **λex**  **(nm)** | **λem**  **(nm)** | **FWHM**  **(nm)** | **IQE**  **(%)** | **EQE**  **(%)** | **AE**  **(%)** | **I423K/I298K** | **References** |
| --- | --- | --- | --- | --- | --- | --- | --- | --- |
| LiInGe2O6:Cr3+ | 460 | 880 | 172 | 81 | 39 | 48 | ~30% | 4 |
| LiInO2:Cr3+ | 468 | 897 | 129 | 42 | 25 | 59 | 8.6% | 5 |
| Ga2GeO5 | 428 | 910 | 221 | 71 | 19 | 27 | 50% | 6 |
| NaInGe2O6:Cr3+ | 480 | 900 | 175 | 34 | - | - | 25% | 7 |
| ZnNb2O6:Cr3+ | 515 | 930 | 210 | 70 | 28 | 40 | ~10% | 8 |
| ZnTa2O6:Cr3+ | 480 | 935 | 185 | 25 | 14 | 56 | - | 9 |
| Mg2GeO4:Cr3+ | 465 | 940 | 236 | 48 | 16 | 33 | 26% | 10 |
| LaTiTaO6:Cr3+ | 354 | 950 | 300 | 10 | - | - | - | 11 |
| LiIn2SbO6:Cr3+ | 492 | 970 | 235 | 7 | 3.44 | 49 | - | 12 |
| LiInF4:Cr3+ | 470 | 980 | 220 | - | - | - | ~10% | 13 |
| Mg2SiO4:Cr3+, Li+ | 468 | 960 | 226 | 70 | 48 | 68 | 58% | 14 |
| LiAl5O8:Cr3+ | 400 | 950 | 295 | 85 | 20 | 24 | 86% | 15 |
| Ga6Ge2O13:Cr3+ | 430 | 880 | 215 | 53 | 36 | 69 | 60% | This work |

**Table S4.** Fitting parameters for Cr K-edge EXAFS of GGO:6% Cr3+.

| **Sample** | **Shell** | **Bond length**  **(Å)**[b] | **CN**[c] | **σ2 (Å2)**[d] | **E0 shift(eV)**[e] | **R-factor**[f] |
| --- | --- | --- | --- | --- | --- | --- |
| GGO:6% Cr3+ | Cr-O | 1.97 ± 0.01 | 6.1 ± 0.8 | 0.003 ± 0.002 | -3.4 ± 1.6 | 0.019 |
| Cr-M [a] | 2.94 ± 0.02 | 3.2 ± 1.2 | 0.004 ± 0.003 |

[a]. Value of the amplitude reduction factor (S02) was fixed to 0.79, M = Cr, Ga or Ge; [b]. Bond length is the interatomic distance; [c]. CN is the coordination number; [d]. σ2 is Debye-Waller factor (a measure of thermal and static disorder in absorber scatter distance); [e]. E0 shift is edge-energy shift (the difference between the zero kinetic energy value of the sample and that of the theoretical model); [f]. R factor is used to value the goodness of the fitting.

**References**

1. Huang, D. C. et al. Efficient and thermally stable broadband near-infrared emission from near zero thermal expansion AlP3O9: Cr3+ phosphors. *Inorg. Chem. Front.* **9**, 692-1700 (2022).

2. Song, L. P. et al. Ultra-broad near-infrared emitting phosphor LiInF4: Cr3+ with extremely weak crystal field. *Inorg. Chem.* **62**, 11112-11120 (2023).

3. Dalal M: electronic spectra of transition metal complexes, a textbook of inorganic chemistry, India: Dalal Institute. **1**, 280-299 (2017).

4. Liu, T. Y. et al. Efficient near-infrared pyroxene phosphor LiInGe2O6: Cr3+ for NIR spectroscopy application. *J. Am. Ceram. Soc.* **104**, 4577-4584 (2021).

5. Qin, Y. F. et al. Efficient near-infrared luminescence in LiInO2: Cr3+ phosphor for light-emitting-diodes. *Opt. Mater.* **143**, 114284 (2023).

6. Peng, C.-Y. et al. Six- and five-coordinated Cr3+ in Ga2GeO5 invokes tunable broadband near-infrared emission toward night-vision applications. *Rare Met.* **42**, 3787-3796 (2023).

7. Zhou, W. Y. et al. Luminescent properties and LED application of broadband near-infrared emitting NaInGe2O6: Cr3+ phosphors. *Ceram. Int.* **47**, 25343-25349 (2021).

8. Qin, S. L. et al. Dual site occupation toward the broadband near-infrared ZnNb2O6: Cr3+ phosphor. *J. Lumin.* **289**, 121640 (2026).

9. He, S. X. et al. Near-infrared broadband ZnTa2O6: Cr3+ phosphor for pc-LEDs and its application to nondestructive testing. *Inorg. Chem.* **61**, 11284-11292 (2022).

10. Cai, H. et al. Tuning luminescence from NIR-I to NIR-II in Cr3+-doped olivine phosphors for nondestructive analysis. *J. Mater. Chem. C.* **9**, 5469-5477 (2021).

11. Yang, Y. et al. Ultra-broadband near-infrared phosphors realized by the heterovalent substitution strategy. *Inorg. Chem.* **62**, 3601-3608 (2023).

12. Liu, D. J. et al. Simultaneous broadening and enhancement of Cr3+ photoluminescence in LiIn2SbO6 by chemical unit cosubstitution: night-vision and near-infrared spectroscopy detection applications. *Angew. Chem. Int. Ed.* **60**, 14644-14649 (2021).

13. Chang, H. et al. Site-selective occupancy of Cr3+ enabling tunable emission from near infrared I to II in fluoride LiInF4: Cr3+. *J. Mater. Chem. C.* **12**, 3175-3184. (2024).

14. Zhong, L. et al. Valence and site engineering enable efficient broadband near-infrared emission at 960 nm in Cr3+-activated forsterite. *Adv. Mater.* **37**, 2508768 (2025).

15. Yan, Y. Q. et al. Unique spectral broadening induced by exchange coupling between Cr3+ ions in LiAl5O8: Cr3+ phosphors for versatile optical applications. *Laser Photonics Rev.* **19**, 2401588 (2025).
